# Supplementary material for: Extended anisotropic phonon dispersion and optical properties of two-dimensional ternary SnSSe
Source: Royal Society of Chemistry journal article supplement (doi:10.1039/d1qi01141c), 2021-10-27
Supplement: d1qi01141c1.pdf [file d1qi01141c1.pdf]

## Extended anisotropic phonon dispersions and optical properties of two-dimensional ternary SnSSe

Received 00th January 20xx,  
Accepted 00th January 20xx

Muhammad Usman<sup>a, ‡</sup> (0000-0001-6508-3706) Zahir Muhammad<sup>b, ‡</sup>, Ghulam Dastgeer<sup>c</sup>, Natalia Zawadzka<sup>d</sup>, Yijie Niu<sup>e</sup>, Muhammad Imran<sup>f</sup>, Maciej R. Molas<sup>d</sup> and Rui Hu<sup>a,\*</sup>

DOI: 10.1039/x0xx00000x

### Supporting Results

| Elements | Weight% |
|----------|---------|
| Sn       | 34      |
| S        | 33      |
| Se       | 33      |

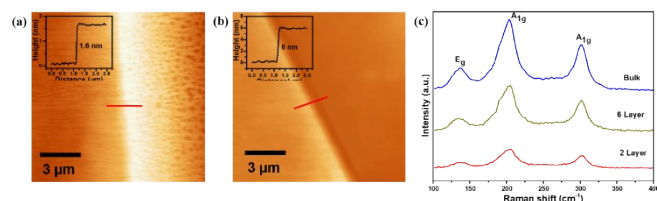

**Fig. S2** AFM image of the exfoliated SnSSe flakes with thicknesses of (a) 1.6 nm and (b) 6 nm with scale bars: 3 μm. (c) Raman spectra of different thickness.

The PL spectra were measured at various SnSSe flakes having different thicknesses. The PL intensity is observed to decrease, being anticipated for this material, with the decrease of the flake thicknesses [1, 2]. Herein, the PL peak position scarcely relies on the thickness. As is known, the observed two kinds of

recombination transitions exist in order to photogenerated electron-hole pairs: non-radiative recombination via defect states and radiative recombination inside the SnSSe materials. So, the reduction of the PL intensity in response to thickness might arise from the existence of non-radiative recombination during surface defect states or electron (hole) trap constituted by the uncompensated positive (negative) charge at the dangling bonds on surface [3, 4]. Moreover, further non-radiative recombination arises by virtue of a smaller escape length through surface defect states. On the other hand, a decrease in the number of photogenerated electron-hole pairs upon decrease in SnSSe absorption in thinner flakes is another affecting factor. Possibly, the observed decrease within the PL intensity is sharp than anticipated from the decrease of SnSSe thickness. Thus, non-radiative recombination within surface defect states and a decrease in absorption may provide a low PL quantum yield of thinner SnSSe flakes.

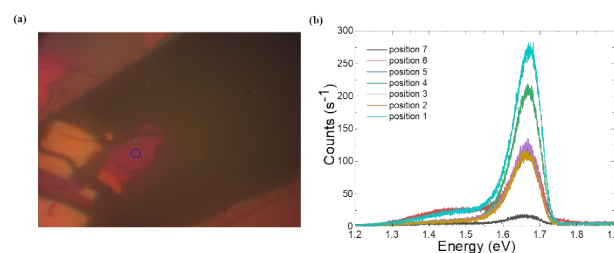

**Fig. S3** (a) Optical microscopy image of SnSSe (b) PL spectra of the SnSSe flakes with different thicknesses.

<sup>a</sup> Key Laboratory of Optoelectronic Devices and Systems of Ministry of Education Guangdong Province, College of Physics Optoelectronic Engineering, Shenzhen University, Shenzhen 518060, P. R. China

<sup>b</sup> Hefei Innovation Research Institute, School of Microelectronics, Beihang University, Hefei 230013, P. R. China

<sup>c</sup> Department of Physics & Astronomy and Graphene Research Institute-Texas Photonics Center International Research Center (GRI-TPC IRC), Sejong University, Seoul 05006, Korea.

<sup>d</sup> Institute of Experimental Physics, Faculty of Physics, University of Warsaw, ul. Pasteura 5, 02-093 Warsaw, Poland

<sup>e</sup> Department of chemistry, Faculty of science, King Khalid University, P.O. Box 9004, Saudi Arabia

<sup>‡</sup> These authors contributed equally in this work

\*Corresponding authors: [rhu@szu.edu.cn](mailto:rhu@szu.edu.cn)

### Notes and references

- Huang, Y.; Sutter, E.; Sadowski, J. T.; Cotlet, M.; Monti, O. L.; Racke, D. A.; Neupane, M. R.; Wickramaratne, D.; Lake, R. K.; Parkinson, B. A.; Sutter, P. Tin Disulfide An Emerging Layered Metal Dichalcogenide Semiconductor: Materials Properties and Device Characteristics. *ACS Nano* 2014, **8**, 10743-10755.
- Del Pozo-Zamudio, O.; Schwarz, S.; Sich, M.; Akimov, I. A.; Bayer, M.; Schofield, R. C.; Chekhovich, E. A.; Robinson, B. J.; Kay, N. D.; Kolosov, O. V. et al. Photoluminescence of

- two-dimensional GaTe and GaSe films. *2D Mater.* 2015, **2**, 035010.
- 3 Mudd, G. W.; Svatek, S.A.; Ren, T. H.; Patanè, A.; Makarovskiy, O.; Eaves, L.; Beton, P. H.; Kovalyuk, Z. D.; Lashkarev, G. V.; Kudrynskyi, Z. R. et al. Tuning the bandgap of exfoliated InSe nanosheets by quantum confinement. *Adv. Mater.* 2013, **25**, 5714-5718.
- 4 Golovynskyi, S.; Bosi, M.; Seravalli, L.; Li, B. MoS<sub>2</sub> two-dimensional quantum dots with weak lateral quantum confinement: Intense exciton and trion photoluminescence. *Surfaces and Interfaces* 2021, **23**, 100909.
